# Supplementary material for: Frequent Promoter Hypermethylation and Down Regulation of BNIP3: An Early Event During Gallbladder Cancer Progression
Source: Research Square preprint supplement (doi:10.21203/rs.3.rs-270934/v1), 2021-03-11
Supplement: Supplementary file 1 [file 3ab39de51ace47cecc796b68.docx]

| BNIP3 | Sequences | Product length, bp | Tm, ˚C |
| --- | --- | --- | --- |
|  | Expression Primers |  |  |
| Forward Primer  Reverse Primer | CTTCAGCAATAATGGGAAC  CTATGGGTATCTGTTTCAG | 196 | 55 |
|  | MSP Primers |  |  |
| Unmethylated  Forward Primer  Reverse Primer | AATTATAGATTGTGGAGGGTAAT  CAAACAAAAATTAACTTAAACCC | 155 | 55 |
| Methylated  Forward Primer  Reverse Primer | AATTATAGATCGCGGAGGGTAAC  CGAACGAAAATTAACTTAAACCC | 155 | 56 |
| BNIP3- Bcl-2/adenovirus E1B 19 kDa-interacting protein3; Tm- melting temperature. | | | |

**Supplementary Table 1** Primer sequences used in mRNA expression and methylation study of BNIP3
