# Supplementary material for: Frequent Promoter Hypermethylation and Down Regulation of BNIP3: An Early Event During Gallbladder Cancer Progression
Source: Research Square preprint supplement (doi:10.21203/rs.3.rs-270934/v1), 2021-03-11
Supplement: Supplementary file 2 [file 3e042bcfb1e5c324e48eecb5.docx]

| Parameters | No. | % |
| --- | --- | --- |
| Extent of Tumor (T) category | | |
| T1 | 19 | 22.6 |
| T2a/b | 23 | 27.3 |
| T3 | 39 | 46.4 |
| Tx | 3 | 3.6 |
| Lymph Node Metastasis (N) category | | |
| N0 | 40 | 47.6 |
| N1 | 25 | 29.8 |
| N2 | 6 | 7.1 |
| Nx | 13 | 15.5 |
| Distant Metastasis (M) category | | |
| M0 | 67 | 79.8 |
| M1 | 13 | 15.5 |
| Mx | 4 | 4.7 |
| Tumor Stage | | |
| I | 15 | 17.8 |
| II | 21 | 25 |
| IIIA/IIIB | 33 | 39.3 |
| IVA/IVB | 15 | 17.9 |
| Histological Grade | | |
| Well | 29 | 34.5 |
| Moderate | 33 | 39.3 |
| Poor | 22 | 26.2 |
| Gallstone status | | |
| Present | 44 | 52.4 |
| Absent | 40 | 47.6 |
| Gender | | |
| Male | 21 | 25 |
| Female | 63 | 75 |
| Age (median age 50) | | |
| ≤ 50 | 47 | 56 |
| > 50 | 37 | 44 |

|  |  |  |
| --- | --- | --- |

**Supplementary Table 2** Clinico-pathological characteristics of GBC patients on the basis of TNM status (according to AJCC 7th edition, 2010) which are included for studying mRNA profile and promoter methylation status of BNIP3 gene.
